# Supplementary material for: Z-scheme CdS/Co9S8-RGO for photocatalytic hydrogen production
Source: Royal Society of Chemistry journal article supplement (doi:10.1039/d0qi00506a), 2020-01-01
Supplement: d0qi00506a1.pdf [file d0qi00506a1.pdf]

## Electronic supplementary information

### Z-scheme CdS/Co<sub>9</sub>S<sub>8</sub>-RGO for Photocatalytic Hydrogen Production

Shuangshuang Kai,<sup>\*a,b</sup> Baojuan Xi,<sup>b</sup> Haibo Li,<sup>c</sup> Shenglin Xiong<sup>b</sup>

<sup>a</sup> *School of Pharmacy, Weifang Medical University, Weifang 261053, Shandong, P. R. China*

<sup>b</sup> *Key Laboratory of Colloid and Interface Chemistry, Ministry of Education, School of Chemistry and Chemical Engineering, and State Key Laboratory of Crystal Materials, Shandong University, Jinan 250100, P. R. China*

<sup>c</sup> *School of Chemistry and Chemical Engineering, Liaocheng University, Liaocheng, Shandong 252059, P. R. China*

*E-mail: kaikaixin133@163.com*

## List of Contents:

|                                                                                                                                                                                                                                 |      |
|---------------------------------------------------------------------------------------------------------------------------------------------------------------------------------------------------------------------------------|------|
| <b>Supplementary figures</b> .....                                                                                                                                                                                              | 3-15 |
| <b>Fig. S1</b> FESEM and TEM images of (A,B) CdS-RGO, (C,D) CdS/CoS-RGO ( $M_{Cd:Co}=5:5$ ), and (E,F) CoS-RGO. Scale bars: (A,C-F) 200 nm, (B) 250 nm.....                                                                     | 3    |
| <b>Fig. S2</b> FESEM (A, B) and TEM (C, D) images of CdS/CoS-RGO with $M_{Cd:Co}=2:8$ . Scale bars: (A) 1 $\mu\text{m}$ , (B-D) 200 nm.....                                                                                     | 4    |
| <b>Fig. S3</b> XRD patterns of CdS-RGO, CdS/CoS-RGO, and CoS-RGO.....                                                                                                                                                           | 5    |
| <b>Fig. S4</b> EDX spectra of CdS-RGO (A), CdS/CoS-RGO (B), and CoS-RGO (C).....                                                                                                                                                | 6    |
| <b>Fig. S5</b> XRD pattern of $\text{Co}_9\text{S}_8$ -RGO heterostructures.....                                                                                                                                                | 7    |
| <b>Fig. S6</b> FESEM images and EDX spectra of CdS/CoS-RGO intermediates collected at different reaction stages at 180 °C for (A) 0 h, (B) 0.5 h, (C) 1 h, (D) 2 h, (E) 6 h, (F) 12 h. Scale bars: 1 $\mu\text{m}$ for all..... | 8    |
| <b>Fig. S7</b> FESEM images of B-CdS-RGO prepared without DETA. Scale bars: (A) 1 $\mu\text{m}$ , (B) 200 nm.....                                                                                                               | 9    |
| <b>Fig. S8</b> TEM images of (A, B) CdS, (C, D) CdS/CoS, and (E, F) CoS prepared without graphene. Scale bars: (A, C, E) 1 $\mu\text{m}$ , (B, D, F) 200 nm.....                                                                | 10   |
| <b>Fig. S9</b> Mott–Schottky plots of (A) CdS-RGO and (B) $\text{Co}_9\text{S}_8$ -RGO.....                                                                                                                                     | 11   |

**Fig. S10** H<sub>2</sub> production rate under visible light irradiation of CdS/Co<sub>9</sub>S<sub>8</sub>-RGO with different Cd/Co molar ratio ( $M_{Cd:Co}$ ) for 1 h.....12

**Fig. S11** H<sub>2</sub> production rate under visible light irradiation of CdS/Co<sub>9</sub>S<sub>8</sub>-RGO with different volumes (x value) of GO added for 1 h.....13

**Fig. S12** FESEM images of CdS/Co<sub>9</sub>S<sub>8</sub>-RGO after 20 h photocatalytic hydrogen evolution. Scale bars: (A) 1 mm, (B) 100 nm.....14

**Fig. S13** XRD patterns of CdS/Co<sub>9</sub>S<sub>8</sub>-RGO before and after the 20 h photocatalytic hydrogen evolution test.....15

**Supplementary Tables**.....16

**Table S1** The comparison of H<sub>2</sub> production performance between CdS/Co<sub>9</sub>S<sub>8</sub>-RGO and related Co based CdS photocatalytic composite materials.....16

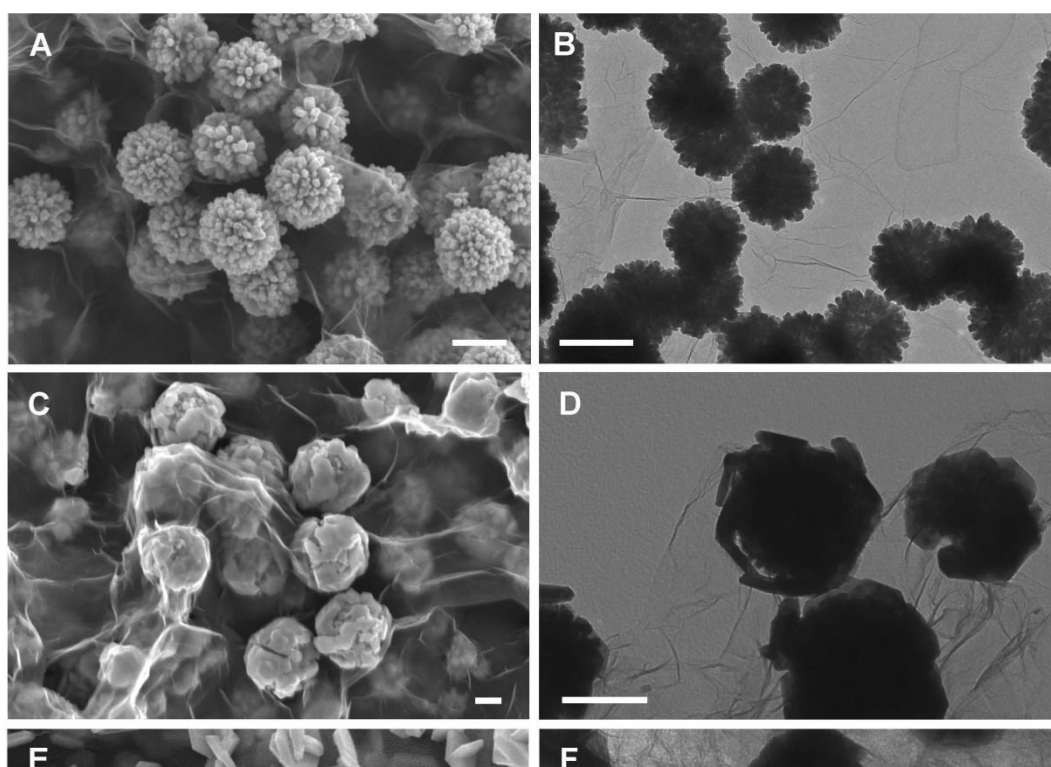

**Figure S1.** FESEM and TEM images of (A, B) CdS-RGO, (C, D) CdS/CoS-RGO ( $M_{\text{Cd:Co}}=5:5$ ), and (E,F) CoS-RGO. Scale bars: (A,C-F) 200 nm, (B) 250 nm.

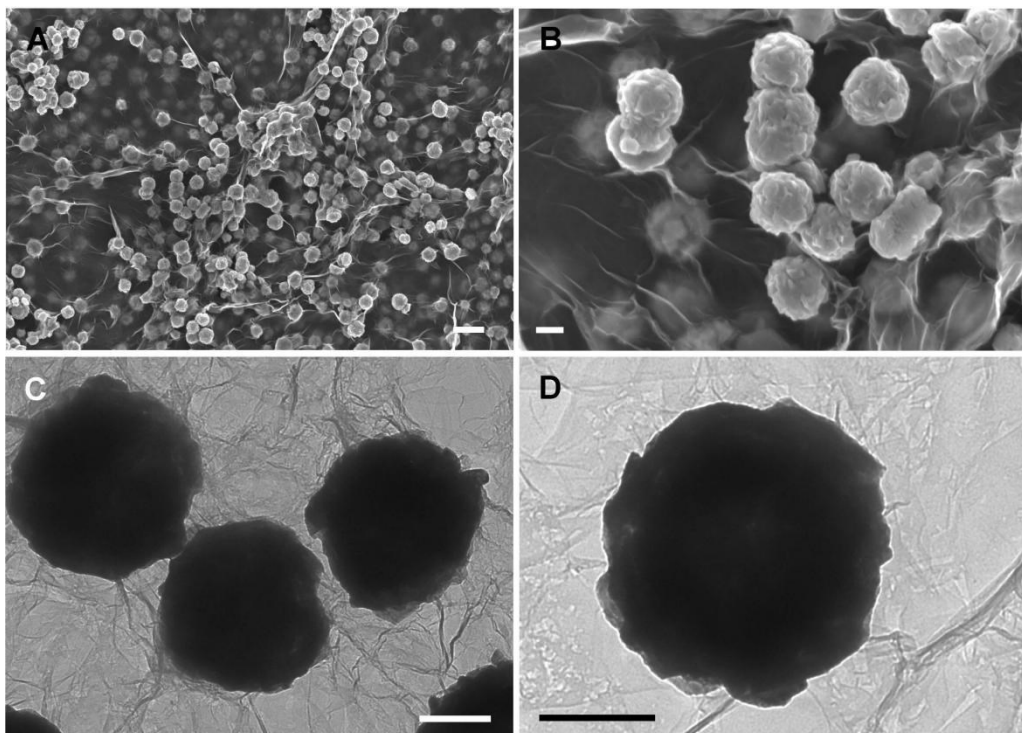

**Figure S2.** FESEM (A, B) and TEM (C, D) images of CdS/CoS-RGO with  $M_{\text{Cd:Co}}=2:8$ .  
Scale bars: (A) 1  $\mu\text{m}$ , (B-D) 200 nm.

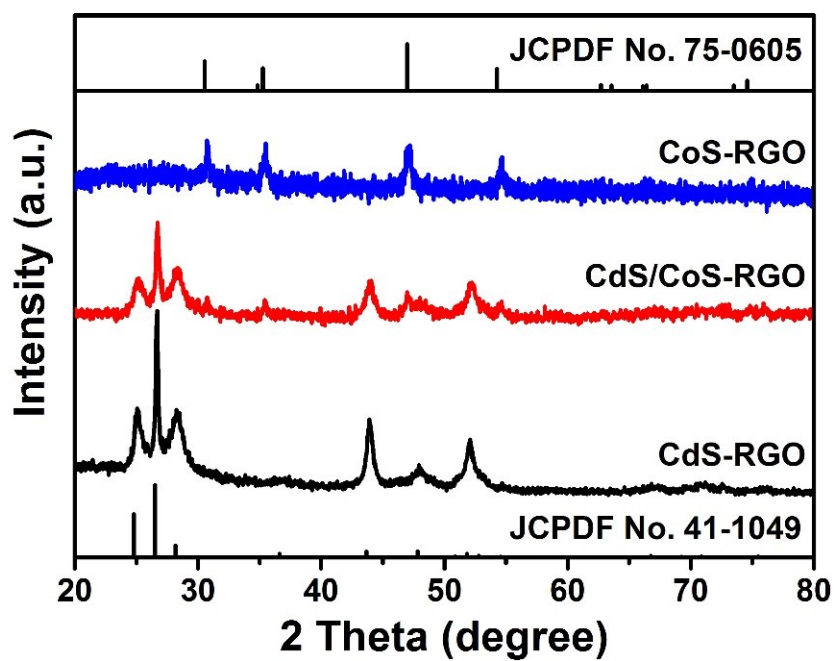

**Figure S3.** XRD patterns of CdS-RGO, CdS/CoS-RGO, and CoS-RGO.

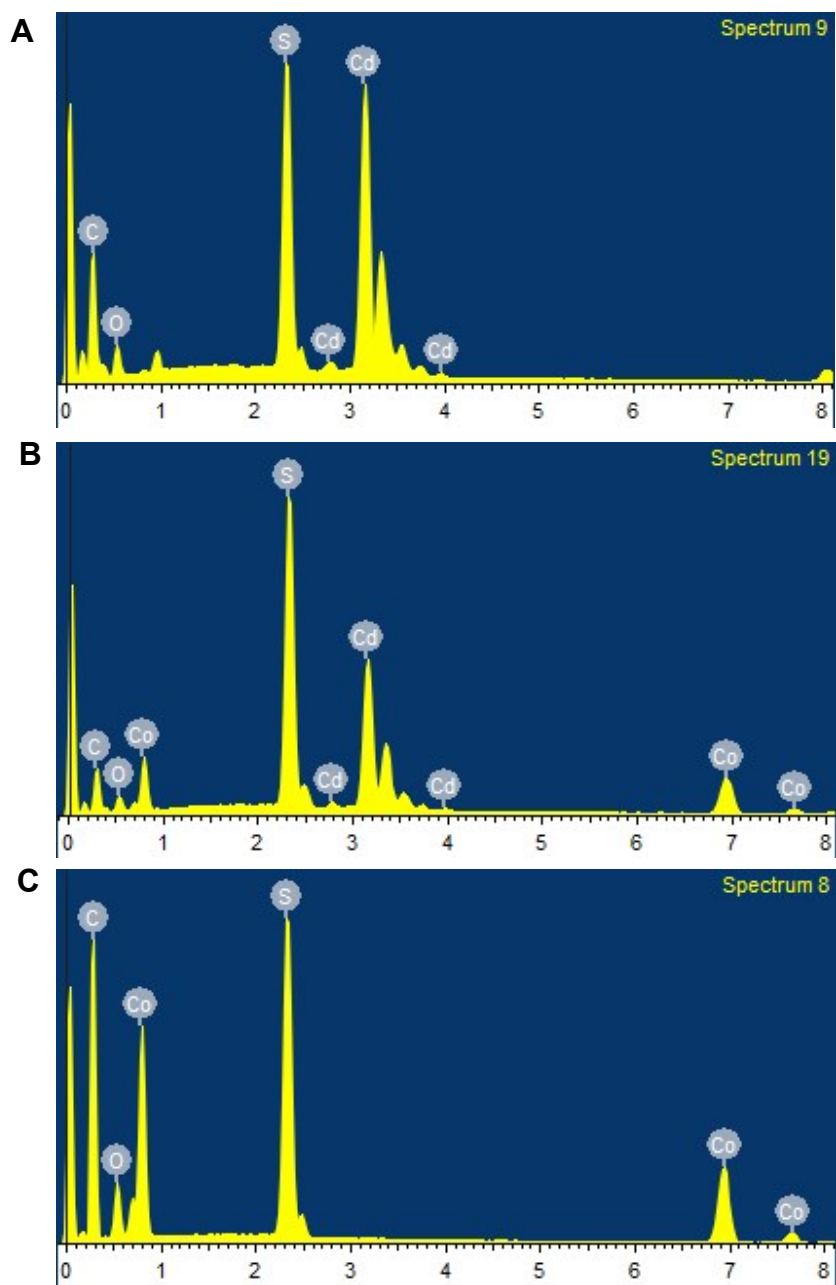

**Figure S4.** EDX spectra of CdS-RGO (A), CdS/CoS-RGO (B), and CoS-RGO (C).

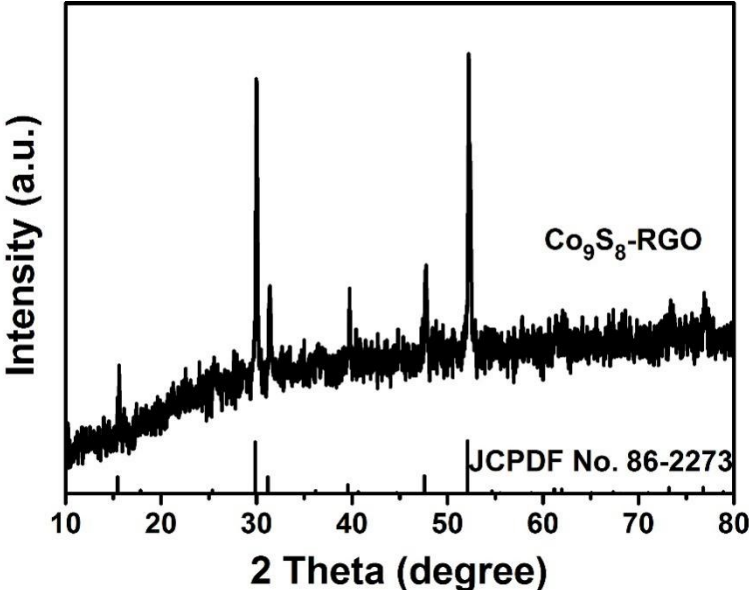

**Figure S5.** XRD pattern of Co<sub>9</sub>S<sub>8</sub>-RGO heterostructures.

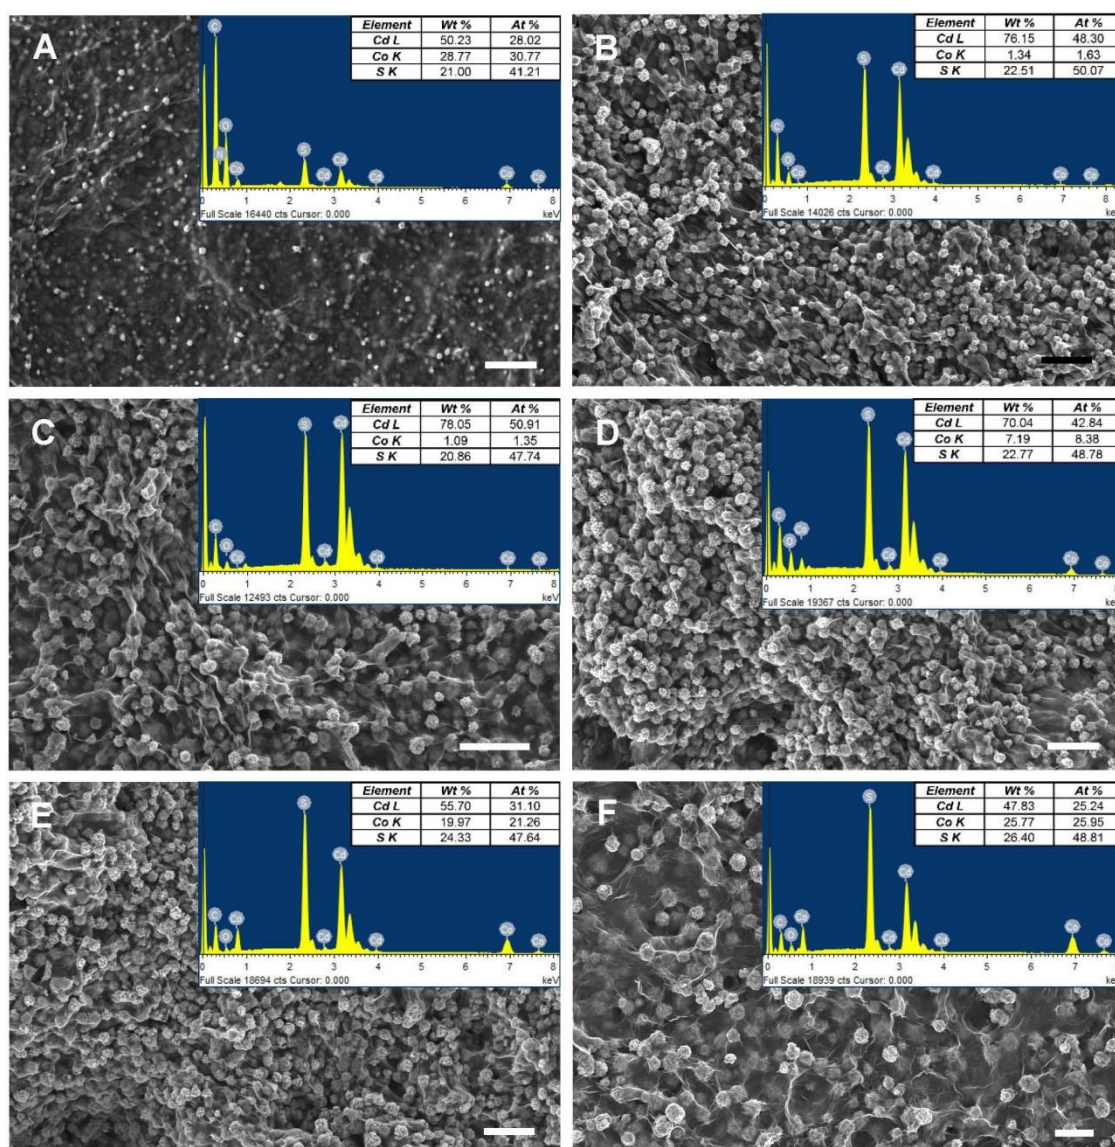

**Figure S6.** FESEM images and EDX spectra of CdS/CoS-RGO intermediates collected at different reaction stages at 180 °C for (A) 0 h, (B) 0.5 h, (C) 1 h, (D) 2 h, (E) 6 h, (F) 12 h. Scale bars: 1 μm for all.



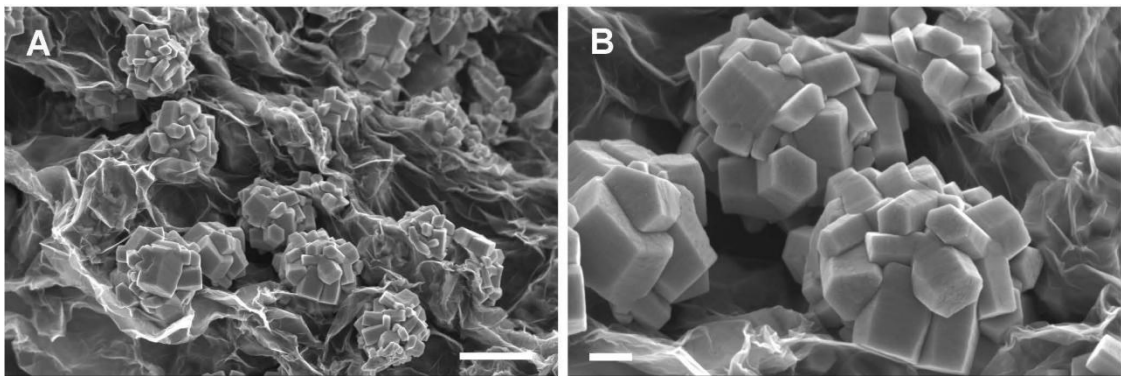

**Figure S7.** FESEM images of B-CdS-RGO prepared without DETA. Scale bars: (A) 1  $\mu\text{m}$ , (B) 200 nm.



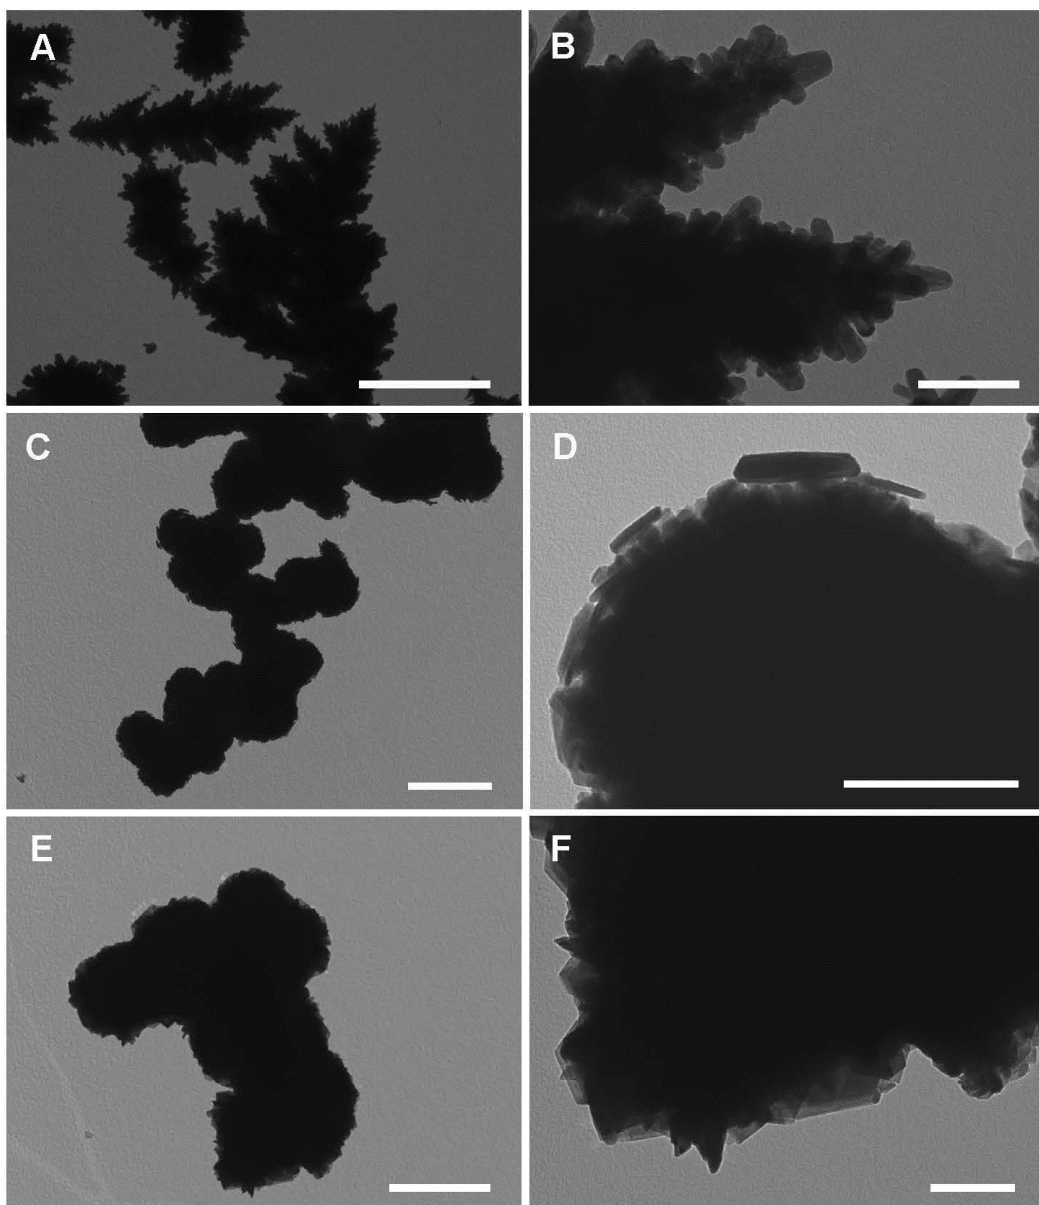

**Figure S8.** TEM images of (A, B) CdS, (C, D) CdS/CoS, and (E, F) CoS prepared without graphene. Scale bars: (A, C, E) 1  $\mu\text{m}$ , (B, D, F) 200 nm.

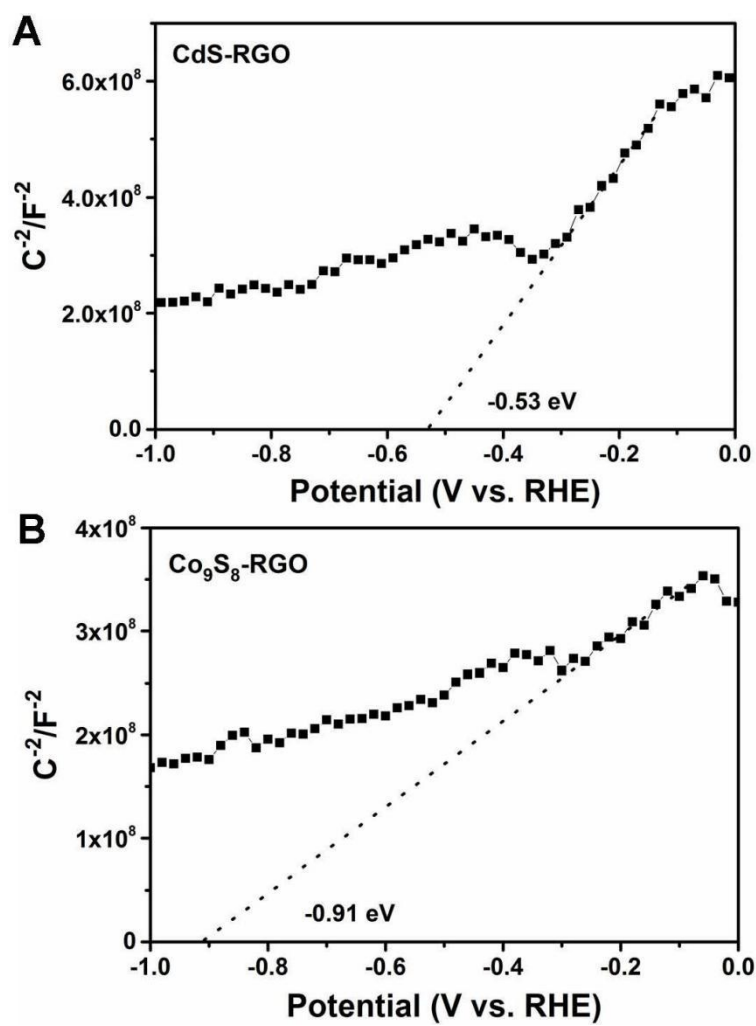

**Figure S9.** Mott–Schottky plots of (A) CdS-RGO and (B) Co<sub>9</sub>S<sub>8</sub>-RGO.

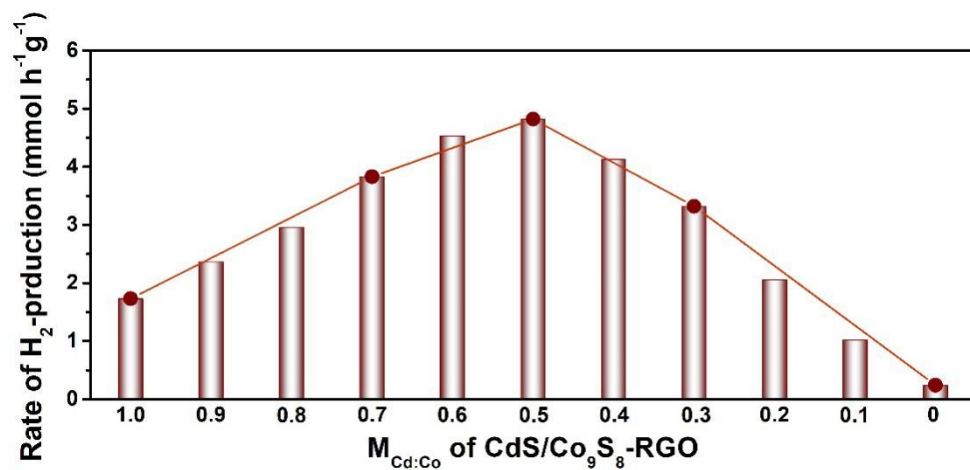

**Figure S10.** H<sub>2</sub> production rate under visible light irradiation of CdS/Co<sub>9</sub>S<sub>8</sub>-RGO with different Cd/Co molar ratio (M<sub>Cd:Co</sub>) for 1 h.

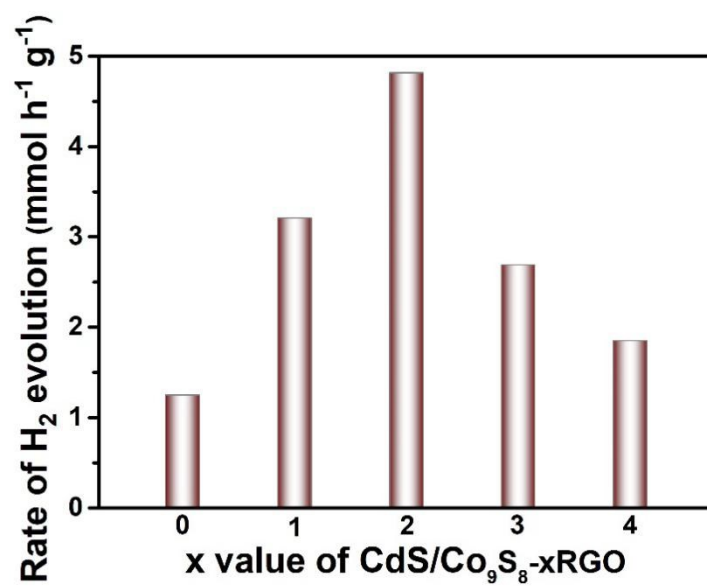

**Figure S11.** H<sub>2</sub> production rate under visible light irradiation of CdS/Co<sub>9</sub>S<sub>8</sub>-RGO with different volumes (x value) of GO added for 1 h.

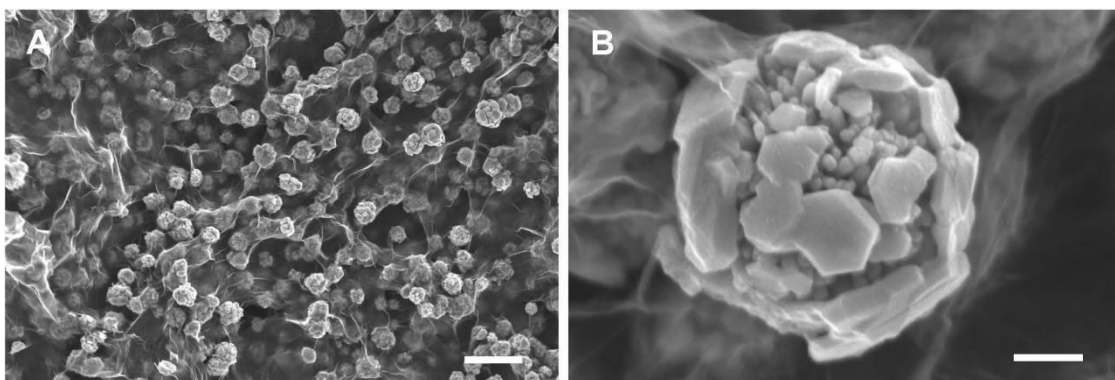

**Figure S12.** FESEM images of CdS/Co<sub>9</sub>S<sub>8</sub>-RGO after 20 h photocatalytic hydrogen evolution. Scale bars: (A) 1 mm, (B) 100 nm.

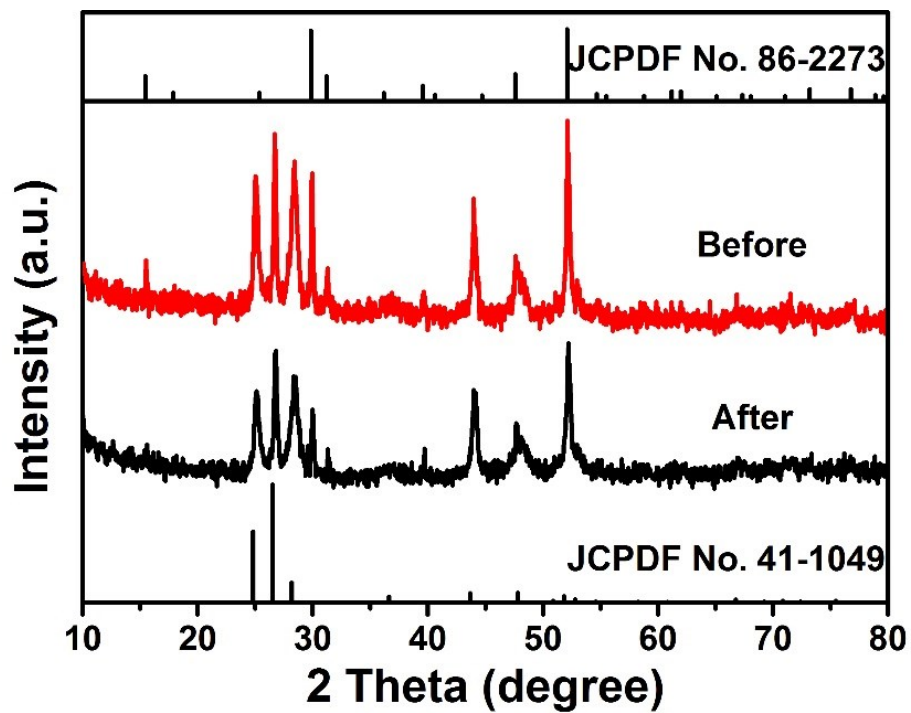

**Figure S13.** XRD patterns of CdS/Co<sub>9</sub>S<sub>8</sub>-RGO before and after the 20 h photocatalytic hydrogen evolution test.

**Table S1.** The comparison of H<sub>2</sub> production performance between CdS/Co<sub>9</sub>S<sub>8</sub>-RGO and related Co based CdS photocatalytic composite materials.



| Photocatalyst                                  | Light Source                  | Catalyst Amount (mg) | Scavenger                                           | H <sub>2</sub> Evolution Rate (mmol/g/h) | Refs.     |
|------------------------------------------------|-------------------------------|----------------------|-----------------------------------------------------|------------------------------------------|-----------|
| CdS/Co <sub>9</sub> S <sub>8</sub> -RGO        | 300 W Xe lamp<br>(λ > 420 nm) | 10                   | Na <sub>2</sub> S + Na <sub>2</sub> SO <sub>3</sub> | 4.58                                     | This work |
| CdS/Co <sub>9</sub> S <sub>8</sub>             | 300 W Xe lamp<br>(AM 1.5 G)   | 20                   | Na <sub>2</sub> S + Na <sub>2</sub> SO <sub>3</sub> | 1.061                                    | S1        |
| CdS/Co(OH) <sub>2</sub>                        | 500 W Xe lamp                 | 100                  | Ethanol                                             | 0.61                                     | S2        |
| CdS/Co(OH) <sub>2</sub>                        | 350 W Xe lamp<br>(λ = 420 nm) | 50                   | Lactic acid                                         | 1.958                                    | S3        |
| CdS/Co <sub>3</sub> O <sub>4</sub>             |                               |                      |                                                     | 3.014                                    |           |
| CdS/CoS                                        |                               |                      |                                                     | 1.232                                    |           |
| CdS/CoO                                        |                               |                      |                                                     | 0.480                                    |           |
| CdS/Co <sub>3</sub> O <sub>4</sub>             | 300 W Xe lamp<br>(λ > 420 nm) | 50                   | Na <sub>2</sub> S + Na <sub>2</sub> SO <sub>3</sub> | 0.236                                    | S4        |
| CoO <sub>x</sub> -loaded TiO <sub>2</sub> /CdS | 300 W Xe lamp<br>(λ ≥ 400 nm) | 10                   | Na <sub>2</sub> S + Na <sub>2</sub> SO <sub>3</sub> | 0.66                                     | S5        |
| CdS-CoS                                        | 300 W Xe lamp<br>(λ ≥ 420 nm) | 300                  | lactic acid                                         | 1.05                                     | S6        |

S1 B. Qiu, Q. Zhu, M. Du, L. Fan, M. Xing, J. Zhang, *Angew. Chem. Int. Ed.* 2017, **129**, 2728.

S2 L. J. Zhang, R. Zheng, S. Li, B. K. Liu, D. J. Wang, L. L. Wang, T. F. Xie, *ACS Appl. Mater. Inter.* 2014, **6**, 13406.

S3 D. Lang, F. Cheng, Q. Xiang, *Catal. Sci. Technol.* 2016, **6**, 6207.

S4 J. Yuan, J. Wen, Q. Gao, S. Chen, J. Li, X. Li, Y. Fang, *Dalton Trans.*, 2015, **44**, 1680.

S5 Z. Yan, H. Wu, A. Han, X. Yu, P. Du, *Int. J. Hydrogen Energy* 2014, **39**, 13353.

S6 W. Zhang, Y. Wang, Z. Wang, Z. Zhong, R. Xu, *Chem. Commun.* 2010, **46**, 7631.
